# Supplementary material for: Individual Postprandial Glycemic Responses to Meal Types by Different Carbohydrate Levels and Their Associations with Glycemic Variability Using Continuous Glucose Monitoring
Source: MDPI journal article supplement (doi:10.3390/nu15163571), 2023-08-13
Supplement: s1 [file s1]

**Supplementary Figures and Tables for Song et al., “Individual postprandial glycemic responses to meal types by different carbohydrate levels and their associations with glycemic variability using continuous glucose monitoring”**

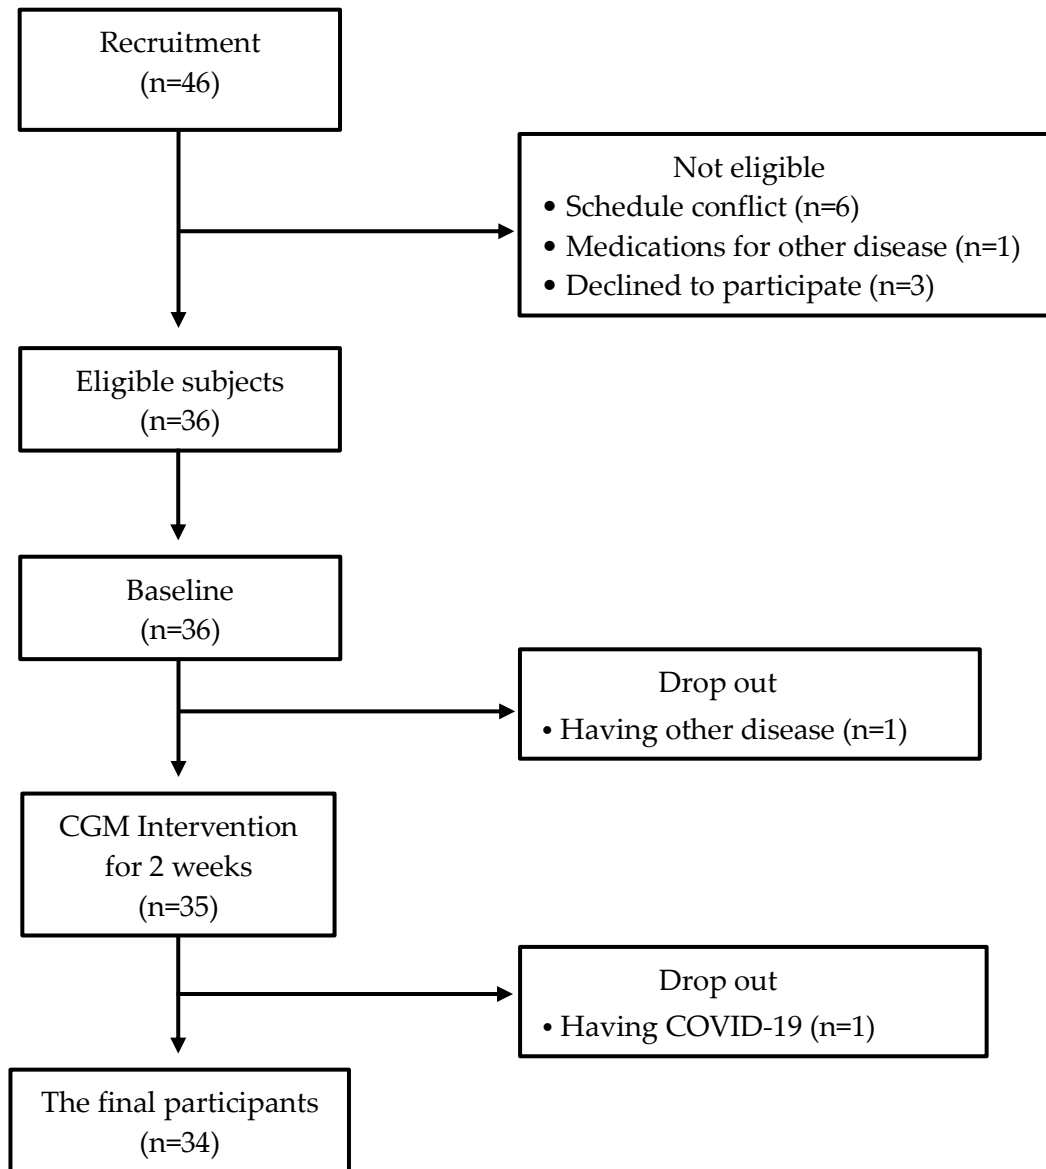

**Figure S1.** Flow chart for selection of study subjects



**Supplementary Table 1.** The degree of fullness and meal duration according to the meal type

|                       | Meal type               |                         |                         |                         | P-value <sup>1</sup> |
|-----------------------|-------------------------|-------------------------|-------------------------|-------------------------|----------------------|
|                       | A (n=34)                | B (n=33)                | C (n=34)                | D (n=34)                |                      |
| Meal duration (min)   | 16.6 ± 6.3 <sup>b</sup> | 15.2 ± 5.9 <sup>b</sup> | 21.8 ± 6.2 <sup>a</sup> | 20.7 ± 5.6 <sup>a</sup> | <.0001               |
| (Interquartile range) | (11.0 - 22.0)           | (11.0 - 20.0)           | (16.0 - 27.0)           | (17.0 - 25.0)           |                      |
| Fullness, n (%)       |                         |                         |                         |                         | 0.1852               |
| Hungry                | 1 (2.9)                 | 3 (9.1)                 | 4 (11.8)                | 4 (11.8)                |                      |
| Neutral               | 1 (2.9)                 | 8 (24.2)                | 7 (20.6)                | 6 (17.7)                |                      |
| Satisfied             | 7 (20.6)                | 12 (36.4)               | 6 (17.7)                | 8 (23.5)                |                      |
| Full                  | 16 (47.1)               | 5 (15.2)                | 10 (29.4)               | 8 (23.5)                |                      |
| Very full             | 9 (26.5)                | 5 (15.2)                | 7 (20.6)                | 8 (23.5)                |                      |

<sup>1</sup> P-values are calculated by ANOVA and Chi-square test
